# Supplementary material for: Impact of Zero Budget Natural Farming on Crop Yields in Andhra Pradesh, SE India
Source: MDPI journal article supplement (doi:10.3390/su14031689), 2022-02-01

**Supplementary Materials: Table S1** Farm crop selection, ZBNF mulch selection and management history

| District  | Farm | Crop<br>Selected | Growing<br>Season (d) | Mulch material used in ZBNF<br>treatment | Soil Texture    | Approx time land has been<br>cultivated (yrs) | Management before experiment         |
|-----------|------|------------------|-----------------------|------------------------------------------|-----------------|-----------------------------------------------|--------------------------------------|
| Anantapur | A1   | Groundnut        | 90-120                | Groundnut Husk                           | Sandy Loam      | Unknown                                       | Conventional                         |
|           | A2   | Groundnut        | 90-120                | Groundnut Husk                           | Sand            | Unknown                                       | Organic                              |
|           | A3   | Groundnut        | 90-120                | Groundnut Husk                           | Sandy Loam      | 30                                            | Conventional, then ZBNF (last 2 yrs) |
| Kadapa    | Ka1  | Tomato           | 60-90                 | Sunhemp and Avisa Leaves                 | Sandy Clay Loam | 8                                             | Conventional                         |
|           | Ka2  | Chilli           | 75-90                 | Groundnut Husk                           | Sand            | 6                                             | Conventional                         |
|           | Ka3  | Groundnut        | 90-120                | Groundnut Husk                           | Loamy Sand      | 10                                            | Conventional & Organic               |
| Krishna   | Kr1  | Okra             | 40-45                 | Paddy Straw                              | Clay            | 20                                            | Unknown                              |
|           | Kr2  | Okra             | 40-45                 | Paddy Straw                              | Clay            | 15                                            | Conventional                         |
|           | Kr3  | Aubergine        | 65-80                 | Paddy Straw                              | Clay            | 10                                            | Conventional                         |
|           | Kr4  | Tomato           | 60-90                 | Paddy Straw                              | Sand            | 12                                            | Conventional                         |
| Nellore   | N1   | Okra             | 40-45                 | Paddy Straw                              | Sandy Loam      | 30                                            | Unknown                              |
|           | N2   | Okra             | 40-45                 | Paddy Straw                              | Clay            | 40                                            | Unknown                              |
|           | N3   | Groundnut        | 90-120                | Groundnut Husk                           | Sand            | 27                                            | Unknown, then ZBNF (last 2 yrs)      |
|           | N4   | Okra             | 40-45                 | Paddy Straw                              | Loamy Sand      | 35                                            | Conventional, then ZBNF (last 3 yrs) |
| Prakasam  | P1   | Cluster Bean     | 85-95                 | Chickpea Husk                            | Clay            | 15                                            | Conventional                         |
|           | P2   | Cluster Bean     | 85-95                 | Groundnut Husk                           | Sandy Loam      | Unknown                                       | Conventional                         |

|               |    |           |       |                |                 |         |              |
|---------------|----|-----------|-------|----------------|-----------------|---------|--------------|
|               | P3 | Okra      | 40-45 | Groundnut Husk | Clay            | Unknown | Conventional |
|               | P4 | Aubergine | 65-80 | Paddy Straw    | Sandy Loam      | Unknown | Conventional |
| Visakhapatnam | V1 | Radish    | 45-60 | Paddy Straw    | Sandy Clay Loam | 0.33    | Conventional |
|               | V2 | Okra      | 40-45 | Paddy Straw    | Sandy Clay Loam | 15      | Conventional |

**Table S2.** Growing protocol for aubergine

|                                              | <b>Aubergine</b>                                                    |                                                          |                                                          |
|----------------------------------------------|---------------------------------------------------------------------|----------------------------------------------------------|----------------------------------------------------------|
|                                              | <b>Conventional</b>                                                 | <b>Organic</b>                                           | <b>ZBNF</b>                                              |
| Seed Rate                                    | 2.34 g/plot 60 cm x 60 cm<br>(plant-plant x row-row)                | 2.34 g/plot 60 cm x 60<br>cm (plant-plant x row-<br>row) | 2.34 g/plot 60 cm x 60<br>cm (plant-plant x row-<br>row) |
| Irrigation                                   | 7-10 d intervals                                                    | 7-10 d intervals                                         | 7-10 d intervals                                         |
| Thiaram or Mancozeb seed<br>treatment        | 3 g/kg seed                                                         | -                                                        | -                                                        |
| Trichoderma seed treatment                   | -                                                                   | 4 g/ kg seed                                             | -                                                        |
| Bijamrita seed treatment                     | -                                                                   | -                                                        | 3 l/kg seed                                              |
| Farmyard Manure                              | 54 kg/plot                                                          | 54 kg/plot                                               | -                                                        |
| Urea                                         | 0.8 kg/plot split over 3<br>doses (30, 60 and 75 d<br>after sowing) | -                                                        | -                                                        |
| Diammonium phosphate<br>(DAP)                | 0.5 kg/plot                                                         | -                                                        | -                                                        |
| Potash (MOP)                                 | 0.36 kg/plot                                                        | -                                                        | -                                                        |
| Micronutirents                               | 5 g dissolved in 1 l water/<br>plot applied as a foliar<br>spray    | -                                                        | -                                                        |
| Solid Jiramrita                              | -                                                                   | -                                                        | 1.8 kg/plot                                              |
| Liquid Jiramrita                             | -                                                                   | -                                                        | 1.8 l/plot every 10 d                                    |
| Panchagavya or<br>Sapthadhanyankura<br>tonic | -                                                                   | -                                                        | 45 ml/plot during<br>flowering stage                     |

---

|                |   |                                                       |                                                  |
|----------------|---|-------------------------------------------------------|--------------------------------------------------|
| Vermicompost   | - | 3.6 kg/plot as a top dressing                         | -                                                |
| Biofertilizers | - | 18 g/plot each<br>Azospirillum and<br>Phosphobacteria | -                                                |
| Neem Cake      | - | 18 g/ plot                                            | -                                                |
| Mulching       | - | -                                                     | Crop residue 5cm thick<br>applied to the surface |

---

**Table S3.** Growing protocol for chilli

|                             | Conventional                                                                                     | Chilli<br>Organic                                    | ZBNF                                              |
|-----------------------------|--------------------------------------------------------------------------------------------------|------------------------------------------------------|---------------------------------------------------|
| Pre-sowing Land preparation | 35 g/plot carbofuran granules                                                                    | 0.89 kg Neem cake                                    | 0.89 kg Neem cake                                 |
| Seed Rate                   | 3.55 g/plot 60 cm x 60 cm (plant-plant x row-row)                                                | 3.55 g/plot 60 cm x 60 cm (plant-plant x row-row)    | 3.55 g/plot 60 cm x 60 cm (plant-plant x row-row) |
| Irrigation                  | 5-7 d intervals                                                                                  | 5-7 d intervals                                      | 5-7 d intervals                                   |
| Imidacloprid seed treatment | 8 g/kg seed plus 3 g/kg seed Captan/ Thiram/ Mancozeb and 150 g/kg seed trisodium orthophosphate | -                                                    | -                                                 |
| Trichoderma seed treatment  | -                                                                                                | 4 g/kg seed plus 10 g/kg seed <i>Pseudomonas</i> sp. | -                                                 |
| Bijamrita seed treatment    | -                                                                                                | -                                                    | 200 ml/kg seed                                    |
| Farmyard Manure             | 88.95 kg/plot                                                                                    | 88.95 kg/plot                                        | -                                                 |
| Urea                        | 106 g/plot split over 3 application (30, 60 and 90 d after sowing)                               | -                                                    | -                                                 |
| Diammonium phosphate (DAP)  | 213 g/plot                                                                                       | -                                                    | -                                                 |
| Potash (MOP)                | 106 g/plot                                                                                       | -                                                    | -                                                 |
| ZnSO <sub>4</sub>           | Foliar spray of 0.5% tree time at 40, 50 and 60 d after sowing                                   | -                                                    | -                                                 |

|                                           |         |                                        |                                                  |
|-------------------------------------------|---------|----------------------------------------|--------------------------------------------------|
| Solid Jiramrita                           | -       | -                                      | 3.55 kg/plot                                     |
| Liquid Jiramrita                          | -       | -                                      | 1.77 l/plot every 15 d                           |
| Panchagavya<br>Sapthadhanyankura<br>tonic | or<br>- | 45 ml/plot during<br>flowering stage   | 45 ml/plot during<br>flowering stage             |
| Vermicompost                              | -       | 17.79 kg/plot                          | -                                                |
| Biofertilizers                            | -       | 1-1.25 kg Azospirillum/<br>Azotobacter | -                                                |
| Mulching                                  | -       | -                                      | Crop residue 5cm thick<br>applied to the surface |

**Table S4.** Growing protocol for growing cluster bean

|                               | Cluster Bean                                                |                                                             |                                                             |
|-------------------------------|-------------------------------------------------------------|-------------------------------------------------------------|-------------------------------------------------------------|
|                               | Conventional                                                | Organic                                                     | ZBNF                                                        |
| Seed Rate                     | 36g/plot                                                    | 36g/plot                                                    | 36g/plot                                                    |
|                               | 15 cm x 45 cm<br>(plant-plant x row-<br>row)                | 15 cm x 45 cm (plant-<br>plant x row-row)                   | 15 cm x 45 cm<br>(plant-plant x row-<br>row)                |
| Irrigation                    | Immediately after<br>sowing and every 7-<br>10 d thereafter | Immediately after<br>sowing and every 7-<br>10 d thereafter | Immediately after<br>sowing and every 7-<br>10 d thereafter |
| Carbendazim seed treatment    | 2 g/kg seed                                                 | -                                                           | -                                                           |
| Trichoderma seed treatment    | -                                                           | 4 g/kg seed                                                 | -                                                           |
| Bijamrita seed treatment      | -                                                           | -                                                           | 3 l/kg seed                                                 |
| Farmyard Manure               | 24 kg/plot                                                  | 24 kg/plot                                                  | -                                                           |
| Compost                       | -                                                           | 20 kg/plot                                                  | -                                                           |
| Urea                          | 2 x 0.8 kg/plot doses<br>(basal dose & after<br>30 d)       | -                                                           | -                                                           |
| Diammonium phosphate<br>(DAP) | 1.6 kg/ plot                                                | -                                                           | -                                                           |
| Potash (MOP)                  | 0.3 kg/ plot                                                | -                                                           | -                                                           |
| Solid Jiramrita               | -                                                           | -                                                           | 4 kg/plot                                                   |
| Liquid Jiramrita              | -                                                           | -                                                           | 4 l/plot every 10 d                                         |
| Panchagavya                   | -                                                           | 5% spray                                                    | -                                                           |
| Sapthadhanyankura<br>tonic    | -                                                           | -                                                           | 45 ml/ plot                                                 |

---

|                |   |                                                  |                                               |
|----------------|---|--------------------------------------------------|-----------------------------------------------|
| Vermicompost   | - | 2.5 kg/plot as top dressing                      | -                                             |
| Biofertilizers | - | 7.2 g/plot each Azospirillum and Phosphobacteria | -                                             |
| Neem Cake      | - | 4 kg/ plot                                       | -                                             |
| Mulching       | - | -                                                | Crop residue 5cm thick applied to the surface |

---



**Table S5.** Growing protocol for groundnut

|                                              | Groundnut                                                       |                                                       |                                                       |
|----------------------------------------------|-----------------------------------------------------------------|-------------------------------------------------------|-------------------------------------------------------|
|                                              | Conventional                                                    | Organic                                               | ZBNF                                                  |
| Seed Rate                                    | 0.75 kg/plot 10 cm x 30 cm<br>(plant-plant x row-row)           | 0.75 kg/plot 10 cm x 30<br>cm (plant-plant x row-row) | 0.75k g/plot 10 cm x 30<br>cm (plant-plant x row-row) |
| Irrigation                                   | 7-10 d intervals                                                | 7-10 d intervals                                      | 7-10 d intervals                                      |
| Carbendizm & Imidacloprid<br>seed treatment  | Carbendizm -2 g/kg seed<br>plus Imidacloprid – 2 ml/ l<br>water | -                                                     | -                                                     |
| Trichoderma seed treatment                   | -                                                               | 4 k/ kg seed                                          | -                                                     |
| Bijamrita seed treatment                     | -                                                               | -                                                     | 200 ml/ kg seed                                       |
| Farmyard Manure                              | -                                                               | 54 kg/plot                                            | -                                                     |
| NPK 12:16:20                                 | 3 kg/plot                                                       | -                                                     | -                                                     |
| Gypsum                                       | 165 g/plot                                                      | -                                                     | -                                                     |
| ZnSO <sub>4</sub>                            | 16.5 g/plot                                                     | -                                                     | -                                                     |
| FeSO <sub>4</sub>                            | 300ml/ plot                                                     | -                                                     | -                                                     |
| Solid Jiramrita                              | -                                                               | -                                                     | 330 g/plot                                            |
| Liquid Jiramrita                             | -                                                               | -                                                     | 330 ml/ plot every 15 d                               |
| Panchagavya or<br>Sapthadhanyankura<br>tonic | -                                                               | -                                                     | 45 ml/plot during<br>flowering stage                  |
| Vermicompost                                 | -                                                               | 3 kg/plot                                             | -                                                     |
| Vermiwash (if available)                     | -                                                               | 1.8 l/ plot asfoliar spray or<br>top dressing         | -                                                     |

---

|                |   |                                                       |                                                  |
|----------------|---|-------------------------------------------------------|--------------------------------------------------|
| Biofertilizers | - | 18 g/plot each<br>Azospirillum and<br>Phosphobacteria | -                                                |
| Neem Cake      | - | 0.9 kg/plot                                           | -                                                |
| Mulching       | - | -                                                     | Crop residue 5cm thick<br>applied to the surface |

---

**Table S6.** Growing protocol for okra

|                                           | <b>Conventional</b>                                                                | <b>Okra<br/>Organic</b>                            | <b>ZBNF</b>                                        |
|-------------------------------------------|------------------------------------------------------------------------------------|----------------------------------------------------|----------------------------------------------------|
| Seed Rate                                 | 54 g/plot 60 cm x 30 cm<br>(plant-plant x row-row)                                 | 54 g/plot 60 cm x 30 cm<br>(plant-plant x row-row) | 54 g/plot 60 cm x 30 cm<br>(plant-plant x row-row) |
| Irrigation                                | 7- 10 d intervals                                                                  | 7- 10 d intervals                                  | 7- 10 d intervals                                  |
| Imidachloprid seed treatment              | 5 g/kg seed                                                                        | -                                                  | -                                                  |
| Trichoderma seed treatment                | -                                                                                  | 4 g/kg seed                                        | -                                                  |
| Bijamrita seed treatment                  | -                                                                                  | -                                                  | 3 l/ kg seed                                       |
| Farmyard Manure                           | 54 kg/ plot                                                                        | 54 kg/ plot                                        | -                                                  |
| Urea                                      | 1 kg/ plot, split over 3<br>doses (333 g/ plot: basal,<br>after 30 d & after 45 d) | -                                                  | -                                                  |
| Diammonium phosphate (DAP)                | 0.5 kg/ plot                                                                       | -                                                  | -                                                  |
| Potash (MOP)                              | 0.36 kg/plot                                                                       | -                                                  | -                                                  |
| Micronutrients                            | 5 g to be mixed in 1 l<br>water and applied as foliar<br>spray                     | -                                                  | -                                                  |
| Solid Jiramrita                           | -                                                                                  | -                                                  | 1.8 kg/plot                                        |
| Liquid Jiramrita                          | -                                                                                  | -                                                  | 1.8 l/plot every 10 d                              |
| Panchagavya<br>Sapthadhanyankura<br>tonic | or<br>-                                                                            | -                                                  | 45ml/ plot                                         |

|                          |   |                                                       |                                                  |
|--------------------------|---|-------------------------------------------------------|--------------------------------------------------|
| Vermicompost             | - | 3.6 kg/plot as top dressing                           | -                                                |
| Vermiwash (if available) | - | 1.8 l/plot as foliar spray or top dressing            | -                                                |
| Biofertilizers           | - | 18 g/plot each<br>Azospirillum and<br>Phosphobacteria | -                                                |
| Neem Cake                |   | 0.9 kg/ plot                                          |                                                  |
| Mulching                 | - | -                                                     | Crop residue 5cm thick<br>applied to the surface |

**Table S7.** Growing protocol for radish

|                                    | <b>Radish</b>                                                   |                                                    |                                                    |
|------------------------------------|-----------------------------------------------------------------|----------------------------------------------------|----------------------------------------------------|
|                                    | <b>Conventional</b>                                             | <b>Organic</b>                                     | <b>ZBNF</b>                                        |
| Seed Rate                          | 36 g/plot 10 cm x 15 cm<br>(plant-plant x row-row)              | 36 g/plot 10 cm x 15 cm<br>(plant-plant x row-row) | 36 g/plot 10 cm x 15 cm<br>(plant-plant x row-row) |
| Irrigation                         | 7- 10 d intervals                                               | 7- 10 d intervals                                  | 7- 10 d intervals                                  |
| Thiaram or Mancozeb seed treatment | 3 g/ kg seed                                                    | -                                                  | -                                                  |
| Trichoderma seed treatment         | -                                                               | 4 g/ kg seed                                       | -                                                  |
| Bijamrita seed treatment           | -                                                               | -                                                  | 3 l/ kg seed                                       |
| Farmyard Manure                    | 90 kg/ plot                                                     | -                                                  | -                                                  |
| Urea                               | 1 kg/ plot split over 2 doses (500 g/ plot: basal & after 30 d) | -                                                  | -                                                  |
| Diammonium phosphate (DAP)         | 2 kg/ plot                                                      | -                                                  | -                                                  |
| Potash (MOP)                       | 1 kg/ plot                                                      | -                                                  | -                                                  |
| Solid Jiramrita                    | -                                                               | -                                                  | 4.4 kg/ plot                                       |
| Liquid Jiramrita                   |                                                                 |                                                    | 4.4 l/plot every 10 d                              |
| Panchagavya                        | -                                                               | 5% spray                                           | -                                                  |
| Sapthadhanyankura tonic            | -                                                               | -                                                  | 45 ml/plot at flowering stage                      |
| Vermicompost                       | -                                                               | 9 kg/plot as top dressing                          | -                                                  |

|                |   |                                                                 |                                                  |
|----------------|---|-----------------------------------------------------------------|--------------------------------------------------|
| Biofertilizers | - | 10 g/plot each<br>Azospirillum, Phosphobacteria and K mobiliser | -                                                |
| Neem Cake      | - | 0.6 kg/plot                                                     | -                                                |
| Oil seed cake  | - | 2 kg/plot                                                       | -                                                |
| Bone meal      | - | 5 kg/plot                                                       | -                                                |
| Mulching       | - | -                                                               | Crop residue 5cm thick<br>applied to the surface |

**Table S8.** Growing protocol for tomato

|                                    | <b>Conventional</b>                                                          | <b>Tomato<br/>Organic</b>                                            | <b>ZBNF</b>                                       |
|------------------------------------|------------------------------------------------------------------------------|----------------------------------------------------------------------|---------------------------------------------------|
| Pre-sowing Land preparation        | 0.28 g/plot carbofuran granules                                              | 0.64 kg – 0.8 kg Neem cake                                           | 0.64 kg – 0.8 kg Neem cake                        |
| Seed Rate                          | 1.12 g/plot 60 cm x 60 cm (plant-plant x row-row)                            | 1.12 g/plot 60 cm x 60 cm (plant-plant x row-row)                    | 1.12 g/plot 60 cm x 60 cm (plant-plant x row-row) |
| Irrigation                         | 10-15 d intervals                                                            | 10-15 d intervals                                                    | 10-15 d intervals                                 |
| Thiaram or Mancozeb seed treatment | 3g /kg seed                                                                  | -                                                                    | -                                                 |
| Trichoderma seed treatment         | -                                                                            | 4 g/kg seed<br>Plus 200g each of N fixing and PSB in 300-400ml water | -                                                 |
| Bijamrita seed treatment           | -                                                                            | -                                                                    | 3 l/ kg seed                                      |
| Farmyard Manure                    | 48-50 kg/plot                                                                | 48-50 kg/plot                                                        | -                                                 |
| Urea                               | 20 g dissolved in 1 l water/plot                                             | -                                                                    | -                                                 |
| Ammonium Nitrate                   | 0.32-0.48 kg split over 3 applications (30, 45 and 60 d after transplanting) | -                                                                    | -                                                 |
| Potash (MOP)                       | 0.32 kg/plot                                                                 | -                                                                    | -                                                 |
| Super Phosphate                    | 1.2 kg/plot                                                                  | -                                                                    | -                                                 |
| ZnSO <sub>4</sub>                  | 0.08 kg/plot                                                                 | -                                                                    | -                                                 |
| Borax                              | 0.06-0.10 kg/plot                                                            | -                                                                    | -                                                 |

---

|                                           |         |                                      |                                                  |
|-------------------------------------------|---------|--------------------------------------|--------------------------------------------------|
| Solid Jiramrita                           | -       | -                                    | 1.6 kg/plot                                      |
| Liquid Jiramrita                          | -       | -                                    | 1.8 l/plot every 10 d                            |
| Panchagavya<br>Sapthadhanyankura<br>tonic | or<br>- | -                                    | 45 ml/plot during<br>flowering stage             |
| Vermicompost                              | -       | 8-12 kg/plot                         | -                                                |
| Neem Cake                                 | -       | 100g suspended in 1 l<br>water/ plot | -                                                |
| Mulching                                  | -       | -                                    | Crop residue 5cm thick<br>applied to the surface |

---



**Table S9.** Pest and disease management strategies in conventional, organic and ZBNF

| Pest/ Disease                                           | Management Strategy                                                                                                             |                                                                                                                     |                                                                                     |
|---------------------------------------------------------|---------------------------------------------------------------------------------------------------------------------------------|---------------------------------------------------------------------------------------------------------------------|-------------------------------------------------------------------------------------|
|                                                         | Conventional                                                                                                                    | Organic                                                                                                             | ZBNF                                                                                |
| Shoot and fruit borer                                   | Quinolphos or Prophenophos (2 ml/l) 1 l per plot<br>Spray twice at 10 d intervals during vegetative and fruit development stage | Pheramone traps (1 per plot)<br>Neem oil or 5% NSKE<br>Trichogramma 180 ml per plot<br>Four times at 7 d intervals  | Pheramone traps (1 per plot)<br>Agnasthram (27 ml/plot)<br>Neemasthram (27 ml/plot) |
| Sucking pest (white fly, aphids leaf hopper and thrips) | Dimethoate (3 ml/l) Spray twice at 10 d intervals<br>1 l per plot<br>Green lace wing bugs<br>1st instar larvae (36/plot)        | Grease coated bottles or yellow plates (1 per Plot)<br>Neem oil or 5% NSKE                                          | Yellow sticky plates (1 per plot)<br>Neemasthram (1.8 l/plot)                       |
| Yellow vein mosaic                                      | Dimethoate (3 ml/l) Spray twice at 10 d intervals<br>1 l per plot                                                               | Grease coated bottles or yellow plates (1 per Plot)<br>Neem oil or 5% NSKE                                          | Yellow sticky plates (1 per plot)<br>Neemasthram (1.8 l/plot)                       |
| Epilachna beetle                                        | Quinolphos or Prophenophos (2 ml/l) 1 l per plot<br>Triazophos 40%EC (2.5 ml/l)                                                 | Neem oil or 5% NSKE                                                                                                 | Agnasthram (27 ml/plot)<br>Neemasthram (1.8 l/plot)                                 |
| Damping Off                                             | Copper oxychloride (2.5g/l) 144 l/plot                                                                                          | Seed treatment, bio-fertilizers and FYM, as described in crop growing protocol                                      | Bijamrita seed treatment as described in crop growing protocol                      |
| Pod borer                                               | Carbaryl 50WP (2 g/l) or Quinalphos 25EC (2 ml/l) 1 l per plot                                                                  | -                                                                                                                   | Neemasthram (1.8 l/plot)<br>Agnasthram (27 ml/plot)                                 |
| Powdery mildew                                          | Wettable sulphur (2 g/l). Spray 3 times at 15 d intervals.<br>1 l per plot                                                      | -                                                                                                                   | Cow milk (27 ml/plot) or Fermented butter milk (54 ml/plot)                         |
| Leaf spot                                               | Mancozeb (2 g /l) or copper oxychloride (2.5 g/l) 1 l per plot                                                                  | Early removal of infected plants.<br>10 g of <i>Trichoderma</i> or <i>Pseudomonas</i> Sp. in 1 l water for spraying | Neemastram (89 ml/ plot)                                                            |
| Leaf miner                                              | Carbofuran (3%) 144 g per plot                                                                                                  | Yellow sticky plates (1 per plot)                                                                                   | Yellow sticky plates (1 per plot)<br>Neemasthram (1.8 l/plot)                       |

**Figure S1.** Example instruction booklet for implementation of experimental design

| Farm Reference                                                                                                                                                                                                                                                                                                                                                                                                                                                                                                                                                                                                                                                                                                                                                                                                                                                                                                                                                                                                                                                                                                                                                                                                                                                                                                                                                                                                                                                                                                                                                                                | District | NFF Name |
|-----------------------------------------------------------------------------------------------------------------------------------------------------------------------------------------------------------------------------------------------------------------------------------------------------------------------------------------------------------------------------------------------------------------------------------------------------------------------------------------------------------------------------------------------------------------------------------------------------------------------------------------------------------------------------------------------------------------------------------------------------------------------------------------------------------------------------------------------------------------------------------------------------------------------------------------------------------------------------------------------------------------------------------------------------------------------------------------------------------------------------------------------------------------------------------------------------------------------------------------------------------------------------------------------------------------------------------------------------------------------------------------------------------------------------------------------------------------------------------------------------------------------------------------------------------------------------------------------|----------|----------|
| Name:                                                                                                                                                                                                                                                                                                                                                                                                                                                                                                                                                                                                                                                                                                                                                                                                                                                                                                                                                                                                                                                                                                                                                                                                                                                                                                                                                                                                                                                                                                                                                                                         |          |          |
| Farm:                                                                                                                                                                                                                                                                                                                                                                                                                                                                                                                                                                                                                                                                                                                                                                                                                                                                                                                                                                                                                                                                                                                                                                                                                                                                                                                                                                                                                                                                                                                                                                                         |          |          |
| District:                                                                                                                                                                                                                                                                                                                                                                                                                                                                                                                                                                                                                                                                                                                                                                                                                                                                                                                                                                                                                                                                                                                                                                                                                                                                                                                                                                                                                                                                                                                                                                                     |          |          |
| <h2 style="margin: 0;">ZBNF Experimental Design</h2>                                                                                                                                                                                                                                                                                                                                                                                                                                                                                                                                                                                                                                                                                                                                                                                                                                                                                                                                                                                                                                                                                                                                                                                                                                                                                                                                                                                                                                                                                                                                          |          |          |
| <p><b>1 Introduction</b></p> <p>This booklet contains all the information you will need to conduct your field experiment (although don't be afraid to ask questions if you are unsure). The experiment is designed to examine the differences between conventional farming, organic farming and ZBNF. Particularly the effects they have on soil properties and yield. <u>Make sure read this booklet in full before starting any work on your experiment.</u></p> <p>It is vital, in order to make this a fair test and a good research piece, that all three farming practices are conducted properly, according to the appropriate guidelines. It is also important that you keep good records, as your experiment will undergo an audit/ inspection from a third party.</p> <p>It is important you keep a record of everything you do on the plots, so make sure you have a notebook/diary that is used solely for this experiment. Use this to record things like:</p> <ul style="list-style-type: none"> <li>➤ Description of activities e.g. weeding</li> <li>➤ What was added e.g. Jiwamrita, fertilizers, pesticides (with quantities and plot number applied to)</li> <li>➤ Any observations on crop health, with plot number (poor/ fair/ good)</li> <li>➤ Always note the date and the plot number of the activity</li> </ul> <p><b>Important:</b> once you have filled in a page of this booklet, take a picture of it and send it to the Whatsapp group. This booklet is tailored to you so if you lose it ask your research coordinator or Sarah to send you another copy.</p> |          |          |
| 1                                                                                                                                                                                                                                                                                                                                                                                                                                                                                                                                                                                                                                                                                                                                                                                                                                                                                                                                                                                                                                                                                                                                                                                                                                                                                                                                                                                                                                                                                                                                                                                             |          |          |

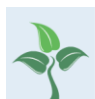

Farm Reference

District

NFF Name

## 2 Setting up the experiment

### 1. You will need:

- 2 tape measures (one 30m, one 3m)
- Sticks (bamboo or similar) – 4 big, 40-50 smaller
- You may also need someone to help you

Note: wind in the tape measure after each measurement, this will stop it getting tangled and makes it easier to keep it tight and straight for each measurement

### 2. We are going to measure out nine 6m x 6m plots, with a 1m path in between, like the drawing below

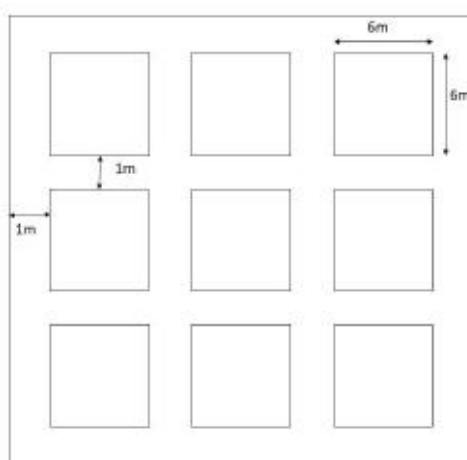

Example of plot experiment, corner of each plot is marked with labelled sticks, clear path between plots.

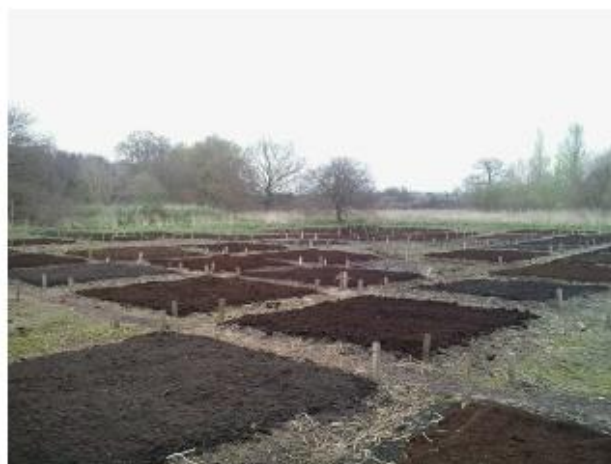

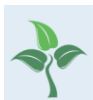

Farm Reference

District

NFF Name

3. First we are going the four plot corners shown below, with the 4 big sticks (the 1m boundary will be added last)

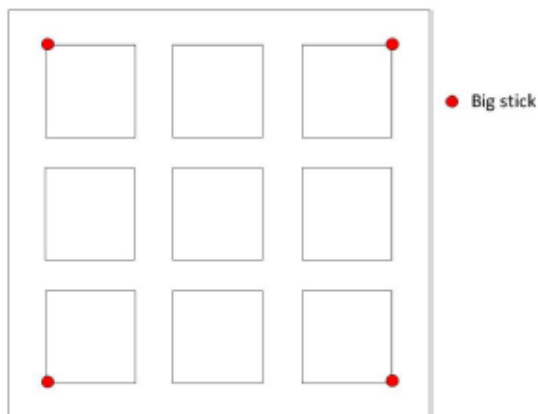

4. Place a big stick in the ground near the corner of the field you are going to use for your experiment (making sure there is enough space to add the 1m path round the outside later)
5. Using the shorter tape measure, create a 1m x 1m square with 3 smaller sticks (this square will help us measure in a straight line)

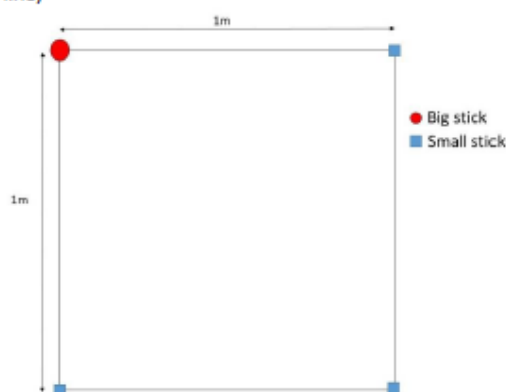

6. When positioning the small sticks, make sure the sides that are connected to the big stick are pointing in a direction where you have a clear path for 20m (see drawing below)



Farm Reference

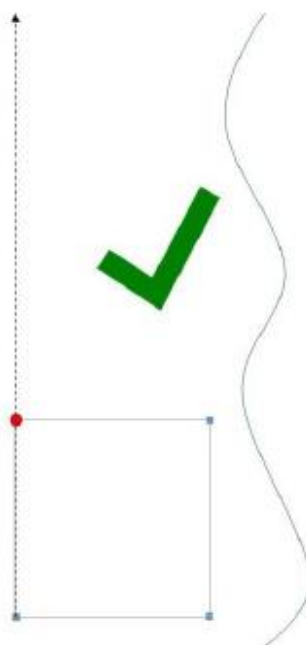

District

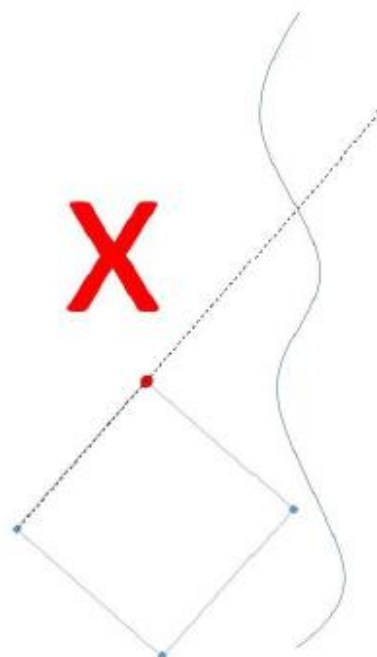

NFF Name

7. From the big stick, keeping the tape measure tight and low to the ground, walk in a straight line for 20m
- Making sure that the big stick, the small stick, and you are all in a straight line
  - When you are happy, place a big stick at the 20m mark

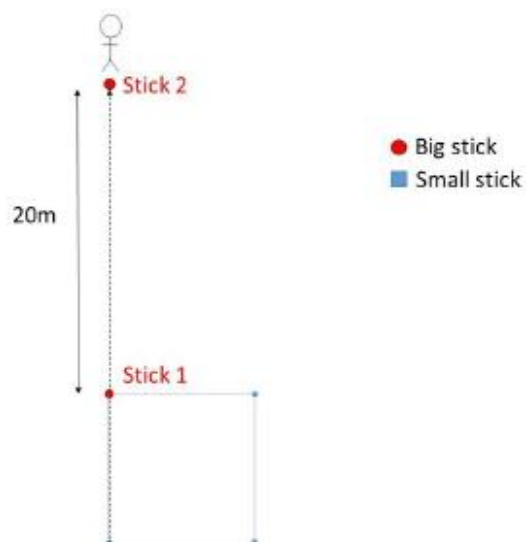



Farm Reference

District

NFF Name

8. Wind in the tape measure and return to big stick 1
9. Repeat step 7 at a right angle to your first measurement
  - a. This time also place a big stick and 20m, and a small stick at 21m

● Stick 2

● Big stick  
■ Small stick

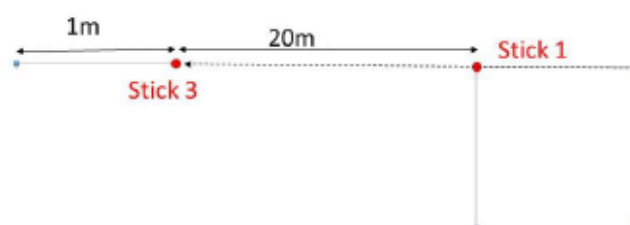

10. Using the small stick that is already in place, create another 1m square another 1m x 1m square around big stick 3 with small sticks (don't move the big stick or the first small stick that is already in place)

● Stick 2

● Big stick  
■ Small stick

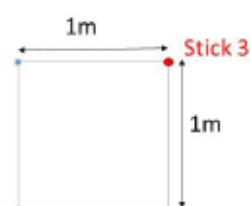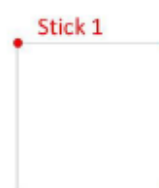



Farm Reference

District

NFF Name

11. Keeping the tape measure tight and low to the ground, walk in a straight line for 20m and put big stick 4 in place (but be prepared you may have to move it during step 12)

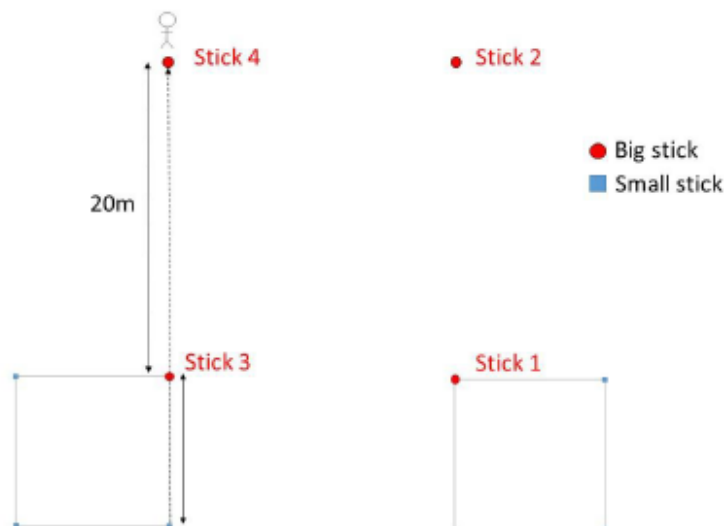

12. Starting from stick 2, keeping the tape measure tight and low to the ground, measure the distance between big stick 2 and 4 to check it is 20m. If it isn't move stick 4 accordingly (making sure to keep the distance between stick 3 and 4 also 20m)
13. Double check the distances between all four of the big sticks is 20m
14. Once you are happy with the positioning of the four big sticks 20m apart, you can start to mark out the rest of the plot boundaries
15. Making sure you keep the tape measure tight and straight, lay out the tape measure between two of the big sticks
16. Place sticks at the 6m, 7m, 13m and 14m mark as shown below

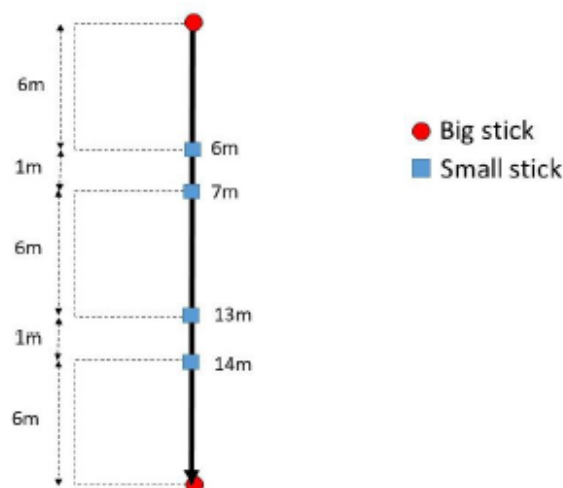



Farm Reference

District

NFF Name

17. Repeat this on all four sides first, and then across the middle as follows:

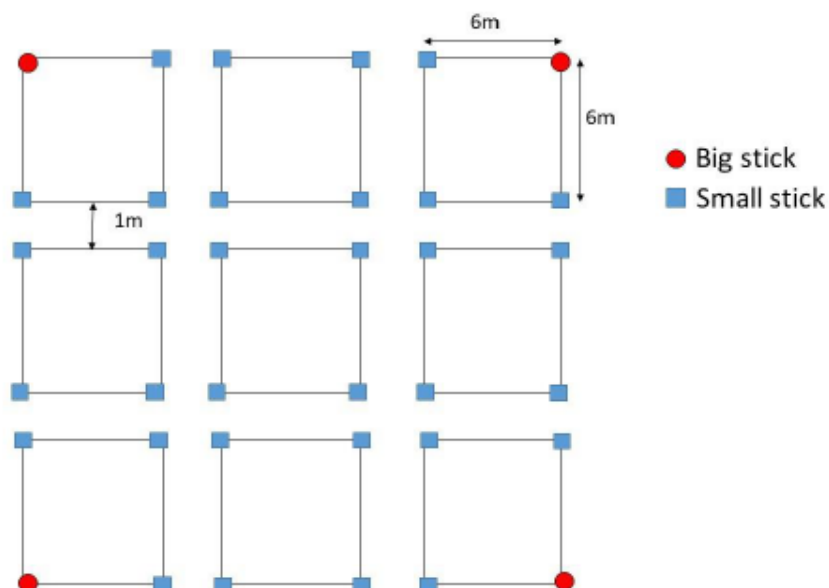

18. Finally, using the remaining small stick, mark out a 1m path around your plots (as seen on page 2)

19. Next you need to number and label the plots according to the treatments drawing below. Make sure to label them in a way that is weather proof! (e.g. paint the sticks)

Note: it is important you stick to the plot arrangement on the next page that is in your booklet, each NFF in your region will have a different arrangement so do not copy someone else's experiment. If you lose your booklet ask your research coordinator or Sarah to send you another copy





Farm Reference

District

NFF Name

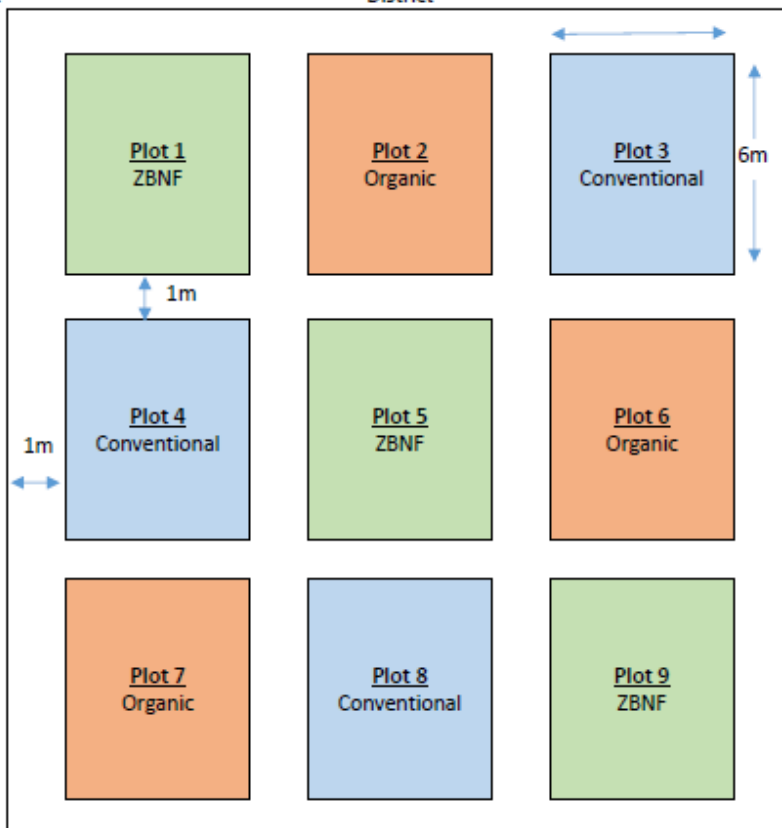

19. It's important you know which plot is which, for the whole experiment. So sketch out your plots in this booklet (page 10) with features around them, so you remember which one is which.

20. Before you start adding your treatments to the plots or sow your crops some initial sampling and assessment is needed (see page 11 onwards)

If your plots are on a slope you may also consider adding drainage ditches in the middle of the path between the plots. Your research coordinator can advise you on this.

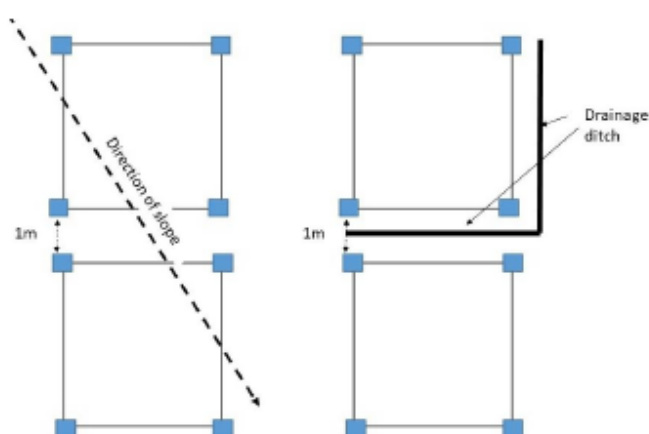

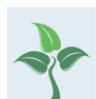

Farm Reference

District

NFF Name

### 3 Initial site description

Before we start, we'd like to know a little about your farm and, more specifically, the areas where you have put the experimental plots. We have provided a form for you to fill in and send a copy to Sarah:

## Site Description

Date: \_\_\_\_\_

Latitude: \_\_\_\_\_

Agro climatic zone: \_\_\_\_\_

Longitude: \_\_\_\_\_

Farm: \_\_\_\_\_

Elevation (m): \_\_\_\_\_

Size of Farm (acres): \_\_\_\_\_

#### Landform designation:

- ☐ Medium gradient mountain
- ☐ Medium gradient hill
- ☐ Medium gradient escarpment
- ☐ Ridges
- ☐ Mountainous highland

- ☐ Dissected plain
- ☐ High gradient mountain
- ☐ High gradient hill
- ☐ High gradient escarpment
- ☐ Valley

- ☐ Major depression
- ☐ Narrow plateau
- ☐ Plain
- ☐ Low gradient mountain
- ☐ Low gradient hill

#### Location of plots

Are the plots on a slope (if so make direction of slope on your plot sketch)? \_\_\_\_\_

How long has this site been cultivated (years)? \_\_\_\_\_

What crop has been cultivated (with years)? If you can please provide the name of the crop cultivar and source of seeds (seed supplier or kept from previous harvest?) \_\_\_\_\_

Has ZBNF been practised on the land? \_\_\_\_\_

If so, how long has ZBNF been practised on this site (years)? \_\_\_\_\_

How was this area managed before ZBNF? \_\_\_\_\_

What proportion of your farm do you practise ZBNF already? \_\_\_\_\_

Do you plan to expand ZBNF to other crops in the next growing season? \_\_\_\_\_

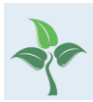

Farm Reference

District

NFF Name

Plot Sketch include orientation, distances, direction of slope, any features (trees, streams, gates etc.)

Farm:

10



Farm Reference

District

NFF Name

#### 4 Treatments

Once all initial assessment has been completed you can start with your treatments, but we need to know some details about how you manage your experimental plots:

##### ZBNF plots

Do you apply jeevamrutham to your crop on these plots? \_\_\_\_\_

Is the application of jeevamrutham soil, foliar or both? \_\_\_\_\_

Do you apply botanical extracts to your crop on these plots? \_\_\_\_\_

Do you apply ghanajeevamrutham to your crop on these plots? \_\_\_\_\_

Do you apply mulching to your crop? \_\_\_\_\_

Is the mulching live or dead? \_\_\_\_\_

Do you treat the seeds before planting? \_\_\_\_\_

##### Organic plots

Give a description of how these plots are managed (inputs, tillage etc.)

---

---

---

---

---

---

---

##### Conventional plots

Give a description of how these plots are managed (inputs, fertilizers, pesticides, tillage etc.)

---

---

---

---

---

---

---

Farm Reference

District

NFF Name

## 5 Crop Sowing

This experiment is a monocrop experiment

It is important that the same number of seeds are sown/ crops transplanted on each plot and they are spread evenly across the whole plot,

Also be sure if you irrigate/ water the crops, all plots must get the same

Example of plot experiment, same number of plants on each plot, evenly spaced

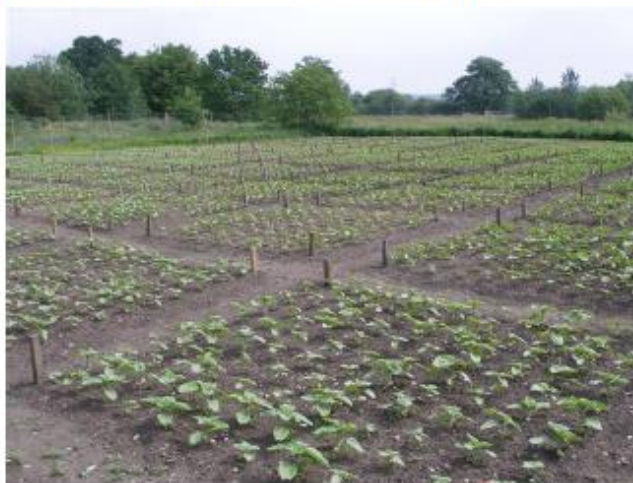

What crop have you sown on the plots (including genotype/ cultivar)? \_\_\_\_\_

Date sown: \_\_\_\_\_

Farm Reference

District

NFF Name

## 6 Yield measurements

At harvest we ask that you keep the harvests of each plot separate (even plots of the same treatment) so you will have 9 piles of harvest. A good way to keep them separate is to have a different tarpaulin (large sheet) for each plot and load the harvest directly onto the sheet.

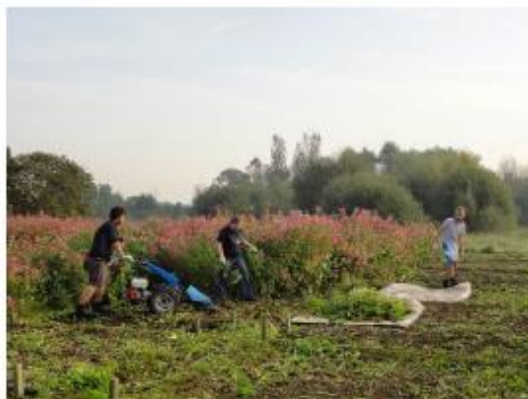

Example of harvest from a single plot being loaded onto one sheet

Full plot measurements you will be taking will be:

Aubergine, Chilli, Okra or Tomato

- Total mass of plant biomass taken off each plot
- Total mass of fruits harvested from each plot

Clusterbean

- Total mass of plant biomass taken off each plot
- Total mass of pods harvested from each plot

Groundnut

- Total mass of plant biomass taken off each plot
- Total mass of pods harvested from each plot
- Total mass of kernels harvested from each plot

Radish

- Total mass of plant biomass taken off each plot

**Figure S2** - Residual plots of REML mixed effects model on z transformed yield (treatment, district and crop variety as factors)

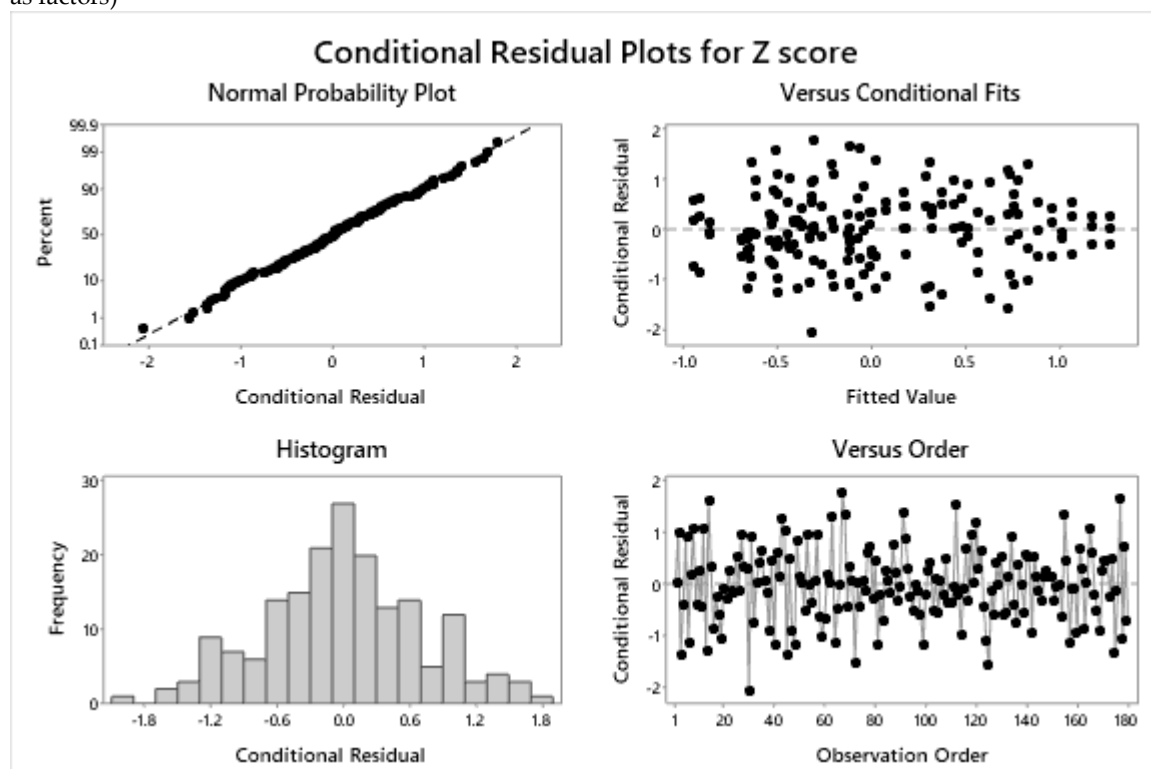

Supplement: s1 [file s1]
